1 **A drug repurposing screen identifies hepatitis C antivirals as inhibitors of the SARS-CoV-2 main**  
2 **protease.**

3

4 Jeremy D. Baker<sup>1,2</sup>, Rikki L. Uhrich<sup>2</sup>, Gerald C. Kraemer<sup>3</sup>, Jason E. Love<sup>4</sup>, and Brian C. Kraemer<sup>1,2,5,6\*</sup>

5 <sup>1</sup>Division of Gerontology and Geriatric Medicine, Department of Medicine, University of Washington,  
6 Seattle, WA 98104, USA.

7 <sup>2</sup>Geriatrics Research Education and Clinical Center, Veterans Affairs Puget Sound Health Care System,  
8 Seattle, WA 98108, USA.

9 <sup>3</sup>Thomas Jefferson High School, Auburn, WA 98001, USA.

10 <sup>4</sup>Western Washington Pathology, Tacoma, 98405, USA.

11 <sup>5</sup>Department of Psychiatry and Behavioral Sciences, University of Washington, Seattle, Washington 98195,  
12 USA.

13 <sup>6</sup>Department of Pathology, University of Washington, Seattle, Washington 98195, USA.

14 \*Corresponding Author (Email: [kraemerb@uw.edu](mailto:kraemerb@uw.edu))

15

16

17 **Abstract**

18 The SARS coronavirus type 2 (SARS-CoV-2) emerged in late 2019 as a zoonotic virus highly transmissible  
19 between humans that has caused the COVID-19 pandemic <sup>1,2</sup>. This pandemic has the potential to disrupt  
20 healthcare globally and has already caused high levels of mortality, especially amongst the elderly. The  
21 overall case fatality rate for COVID-19 is estimated to be ~2.3% overall <sup>3</sup> and 32.3% in hospitalized patients  
22 age 70-79 years <sup>4</sup>. Therapeutic options for treating the underlying viremia in COVID-19 are presently  
23 limited by a lack of effective SARS-CoV-2 antiviral drugs, although steroidal anti-inflammatory treatment  
24 can be helpful. A variety of potential antiviral targets for SARS-CoV-2 have been considered including  
25 the spike protein and replicase. Based upon previous successful antiviral drug development for HIV-1 and  
26 hepatitis C, the SARS-CoV-2 main protease (Mpro) appears an attractive target for drug development.  
27 Here we show the existing pharmacopeia contains many drugs with potential for therapeutic repurposing  
28 as selective and potent inhibitors of SARS-CoV-2 Mpro. We screened a collection of ~6,070 drugs with a  
29 previous history of use in humans for compounds that inhibit the activity of Mpro *in vitro*. In our primary  
30 screen we found ~50 compounds with activity against Mpro (overall hit rate <0.75%). Subsequent dose  
31 validation studies demonstrated 8 dose responsive hits with an IC<sub>50</sub> ≤ 50 μM. Hits from our screen are  
32 enriched with hepatitis C NS3/4A protease targeting drugs including Boceprevir (IC<sub>50</sub>=0.95 μM),  
33 Ciluprevir (20.77μM), Narlaprevir (IC<sub>50</sub>=1.10μM), and Telaprevir (15.25μM). These results demonstrate  
34 that some existing approved drugs can inhibit SARS-CoV-2 Mpro and that screen saturation of all approved  
35 drugs is both feasible and warranted. Taken together this work suggests previous large-scale commercial  
36 drug development initiatives targeting hepatitis C NS3/4A viral protease should be revisited because some  
37 previous lead compounds may be more potent against SARS-CoV-2 Mpro than Boceprevir and suitable for  
38 rapid repurposing.

39

40 **Keywords**

41 COVID-19; SARS-CoV-2; Protease, Mpro; Antiviral; drug repurposing. Boceprevir, Narlaprevir,  
42 Telaprevir, 3C-like protease

## 43 **Introduction**

44 The SARS virus and SARS-CoV-2, the cause of the COVID-19 pandemic, are zoonotic coronaviruses  
45 found in bats that can infect humans. Initial symptoms of SARS-CoV-2 infection include fever, myalgia,  
46 cough, and headache. Infection usually resolves without active medical intervention, but for a subset of  
47 cases infection can progress to viral pneumonia and a variety of complications including acute lung  
48 damage leading to death <sup>5</sup>. While complications are atypical in most cases, mortality rates increase  
49 dramatically with the age and impaired health of infected patients. To date, much of our knowledge of  
50 COVID-19 virology has been inferred from the study of similar Severe Acute Respiratory Syndrome  
51 (SARS) coronavirus and related coronaviruses including Middle East Respiratory Syndrome [reviewed in  
52 <sup>6</sup>]. Like all coronaviruses, SARS-CoV-2 exhibits an enveloped ribonucleoprotein helical capsid containing  
53 a single positive-stranded genomic RNA. Infection starts with receptor-mediated virus internalization,  
54 uncoating, and translation of the viral genome <sup>7</sup>. Polyprotein cleavage by viral proteases yields a  
55 complement of viral structural and accessory proteins. This polyprotein cleavage is mediated by the main  
56 viral protease (Mpro), a chymotrypsin-like protease responsible for endoproteolytic cleavages of viral  
57 polyproteins producing functional viral proteins. Recent structural biology work has solved the crystal  
58 structure of SARS-CoV-2 Mpro yielding structural insights into Mpro function <sup>8,9</sup>.

59 Antiviral drugs effective for COVID-19 would have a broad impact on global healthcare in the  
60 current coronavirus pandemic. Existing antiviral drugs on the market target a wide variety of both RNA  
61 and DNA viruses. Probably the most successful approved antivirals are protease inhibitors such as  
62 atazanavir for HIV-1 and simeprevir for hepatitis C. [reviewed in <sup>10</sup> and <sup>11</sup>]. Other conceptual COVID-19  
63 antiviral targets include the host ACE2 receptor, viral replicase, and viral genome encapsidation.  
64 However, previous work with other RNA viruses suggest that Mpro function is essential for viral  
65 replication and readily targetable using existing technology. Thus, while there are many potentially

66 targetable activities for COVID-19, the coronavirus Mpro seems a likely choice for rapid drug  
67 development.

68 To accelerate drug development we employed a drug repurposing strategy, an approach of utilizing  
69 previously approved drugs for new indications<sup>12,13</sup>. Previous work suggests libraries enriched with known  
70 bioactive drug-like compounds provide the best opportunity for finding new lead compounds<sup>14,15</sup>. Thus  
71 we attempted the selective optimization of side activities (SOSA) approach<sup>16</sup> as a rapid and cost effective  
72 means to identify candidate hits while minimizing the number of compounds screened. The SOSA  
73 approach proceeds by two steps. First a limited set of carefully chosen, structurally diverse, well-  
74 characterized drug molecules are screened; as approved drugs, their bioavailability, toxicity and efficacy  
75 in human therapy has already been demonstrated<sup>16,17</sup>. To screen as much of the available approved drug  
76 space as possible in an easily accessible format we chose to screen the Broad Institute Drug Repurposing  
77 Library (6070 compounds, see **Table S1**)<sup>18</sup>. This represents about half of the approximately 14,000  
78 approved or experimental drugs known to human clinical medicine<sup>19</sup>. There are significant cost and time  
79 advantages realized by drug repurposing as it can accelerate the preclinical phase of development and  
80 streamline clinical trials to focus on efficacy rather than safety.

81 Repositioning existing approved drugs with the capacity to inhibit COVID-19 virus replication and  
82 infection would be of profound utility and immediately impact health care in the current pandemic. There  
83 are no drugs in clinical use specifically targeting coronavirus replication. The major advantage of the  
84 approach taken here is that by screening drugs with a history of previous clinical use, we will be focusing  
85 on compounds with known properties in terms of pharmacokinetics (PK), pharmacodynamics (PD) and  
86 toxicity. Thus, the Broad Repurposing Library we screened consists of compounds suitable for rapid  
87 translation to human efficacy trials.

## 88 **Results**

### 89 **Development of fluorescent Mpro Assays**

90 We began assay development by selecting potentially suitable synthetic Mpro substrates and compared  
91 catalyzed hydrolysis curves between 5 fluorescently labeled substrates (Ac-Abu-Tle-Leu-Gln-AFC<sup>20</sup>,  
92 DABCYL-VKLQ-EDANS, Ac-VKLQ-AFC, DABCYL-TSAVLQSGFRKM-EDANS<sup>21</sup>, and MCA-  
93 AVLQSGFR-K(Dnp)-K-NH<sub>2</sub>)<sup>22</sup>. We chose to use the recently published Ac-Abu-Tle-Leu-Gln-AFC  
94 (Abu=2-Aminobutyrate, Tle=tButylglycine) synthetic non-canonical amino-acid containing peptide as  
95 Mpro more readily cleaves this preferred sequence as compared to the native VKLQ sequence<sup>20</sup>(Fig 1A).  
96 Substrates DABCYL-TSAVLQSGFRKM-EDANS and MCA-AVLQSGFR-K(DnP)-K-NH<sub>2</sub> had  
97 drastically lower rates of Mpro catalyzed hydrolysis and were not considered further in our assay  
98 development (Fig 1A). To determine concentration ratios between Mpro and substrate, we next performed  
99 a two-dimensional titration and chose 625nM Mpro and 8μM substrate for a balance of relatively modest  
100 Mpro protein requirement and a robust fluorescence intensity (Fig 2B). Before screening the Broad library,  
101 we piloted our assay conditions against the NIH Clinical collections library (~650 compounds) and  
102 calculated our Z'-factor for each plate at 0.780 and 0.784 (Fig 1C and D). Z'-factor is a score of suitability  
103 of assays for high-throughput screening and is derived from the equation  $Z'-factor = 1 - \frac{3(\sigma_p + \sigma_n)}{|\mu_p - \mu_n|}$ , where  
104  $\sigma$  = standard deviation,  $\mu$ =mean, p=positive controls, and n=negative controls. A score greater than 0.5  
105 indicates a screenable assay. Although no promising compounds were identified from this smaller library,  
106 it demonstrated that our assay was sufficiently robust for screening the much larger Broad Repurposing  
107 library.

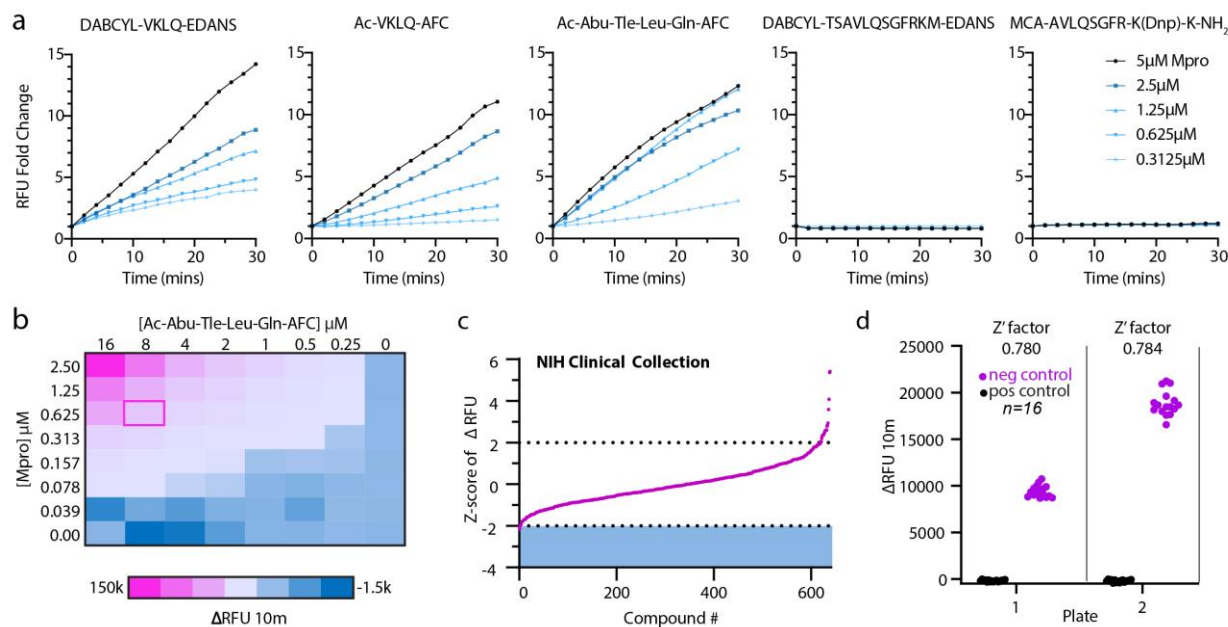

108

### 109 **Fig 1. Mpro assay optimization**

110 (a) Screen of selection of reported Mpro substrates: DABCYL-VKLQ-EDANS, Ac-VKLQ-AFC, Ac-Abu-  
111 Tle-Leu-Gln-AFC, DABCYL-TSAVLQSGFRKM-EDANS, MCA-AVLQSGFR-K(Dnp)-K-NH<sub>2</sub>. Fold  
112 change of increase in RFU was measured over 30 minutes holding substrate constant at 12.5µM with  
113 increasing concentrations of Mpro recombinant protein as indicated. (b) Two-dimensional titration of  
114 substrate Ac-Abu-Tle-Leu-Gln-AFC against Mpro. Concentrations are indicated for substrate along the x-  
115 axis and for Mpro along the y-axis. Heat map corresponds to the change in RFU over 10 minutes and pink  
116 outline ( $\Delta$ RFU 10m=20,810) indicates chosen concentration for NIH Clinical Collection screen (0.625µM  
117 Mpro and 8µM Substrate). (c) Z-score index of NIH Clinical Collection screen (640 compounds). Hit  
118 window was considered at Z-score  $\leq -2$  and was calculated as the Z-score of  $\Delta$ RFU at 10 minutes  
119 corresponding to the linear portion of the curve. X-axis indicates arbitrary compound number arranged by  
120 increasing Z-score. (d) Z'-factor for the two NIH Clinical Collection 384-well plates. Pink circles indicate  
121 negative control (DMSO) and black circles represent positive controls (no protein). Z' factor calculated  
122 at 0.780 and 0.784 for plates 1 and 22 respectively. Y axis represents change in RFU over 10 minutes.

123

### 124 **Drug Repurposing Strategy – screening the Broad Repurposing Library**

125 The concept of drug repurposing is to utilize existing therapeutic drugs to treat a new disease indication.

126 This approach is particularly relevant for COVID-19 because of the potential for an accelerated clinical

127 impact as compared to *de novo* drug development. A systematic approach to facilitate drug repurposing

128 has recently been described (<sup>18</sup>, [http:// www.broadinstitute.org/repurposing](http://www.broadinstitute.org/repurposing)) and has made a large collection

129 of drugs with previous history of use in humans available for high throughput screening. We acquired this

130 ~6,070 compound library as an assay ready collection in 384-well format. We conducted the library screen

131 at 384-well density using the optimized kinetic Mpro assay described in Fig 1. Our overall repurposing  
132 strategy is described in Fig 2A. We conducted a single point screen at 50  $\mu$ M compound concentration and  
133 observed ~50 compounds with activity against SARS-CoV-2 Mpro for an overall hit rate <0.75%. These  
134 compounds were screened in parallel against the natural amino acid substrate (Ac-VKLQ-AFC) as well as  
135 a kinetically preferred substrate (Ac-Abu-Tle-Leu-Gln-AFC) (Fig 2B). Individual compounds are shown  
136 in Table 1.

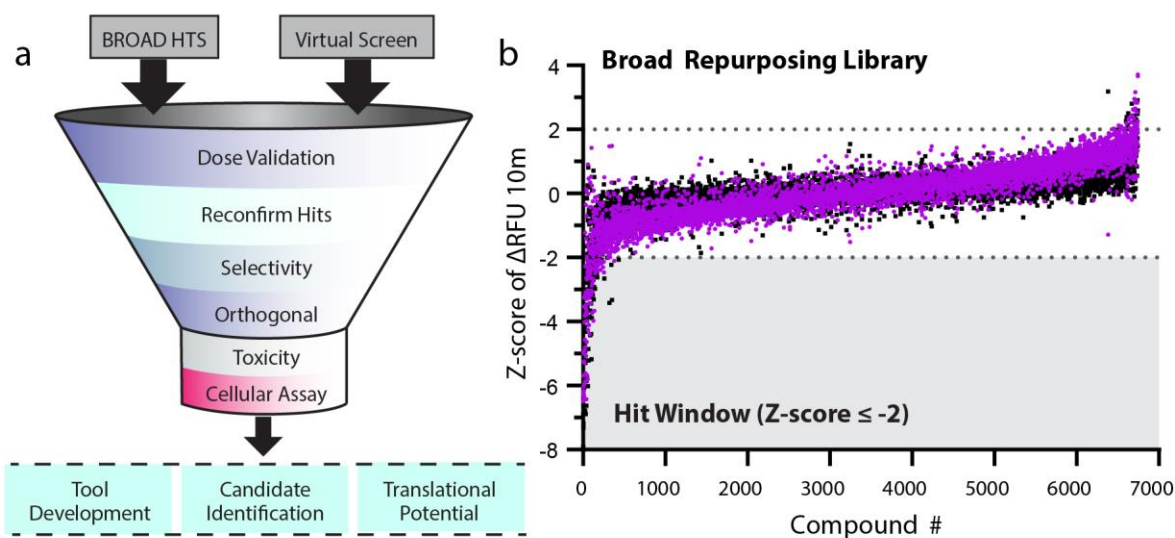

137

### 138 **Fig 2. Screening pipeline and Broad library screen**

139 (a) Schematic of screening funnel. The Broad Repurposing library was screened both empirically and  
140 virtually. Any hit from the Broad library (Z-score  $\leq$  -2) was validated for dose-responsiveness. All suitable  
141 compounds passing this filter with satisfactory curve fitting and potency were ordered as powder and re-  
142 validated. Future efforts will test for selectivity and in orthogonal assays for suitability. Although outside  
143 the scope of this report, determination of viral anti-replicative properties as well as toxic profile at required  
144 dosage will be determined. The goal of this paradigm is to find suitable candidates for development both  
145 as tools for probing underlying mechanisms of SARS-CoV-2 as well as for translational potential. (b)  
146 Screen of the Broad Repurposing Library. Library was screened at a concentration of 50 $\mu$ M against both  
147 Ac-VKLQ-AFC (black) and Ac-Abu-Tle-Leu-Gln-AFC (purple). Hit window was considered for  
148 compounds falling below Z-score  $\leq$  -2 against both substrates and consisted of 50 compounds. Compounds  
149 ordered by average Z-score.

150

151



152 **Table 1.**  
 153 Hits identified from Broad Repurposing Library screen against SARS-CoV-2 Mpro.  
 154

| <i>Common name</i>        | Mechanism of Action                            | Target                             | Status      |
|---------------------------|------------------------------------------------|------------------------------------|-------------|
| <i>Mitoquinone</i>        |                                                |                                    |             |
| <i>Octenidine</i>         | membrane integrity inhibitor                   |                                    | Launched    |
| <i>Boceprevir</i>         | HCV inhibitor                                  | CMA1, CTSA, CTSF, CTSK, CTSL, CTSS | Launched    |
| <i>STS</i>                |                                                | PROC, PROS1                        | Launched    |
| <i>NH125</i>              | EEF2 inhibitor                                 |                                    | Preclinical |
| <i>Visomitin</i>          |                                                |                                    |             |
| <i>Cetrimonium</i>        |                                                |                                    | Launched    |
| <i>Hexachlorophene</i>    | potassium channel activator                    | GLUD1, SDHD                        | Launched    |
| <i>Benzethonium</i>       | sodium channel blocker                         | SCN10A                             | Launched    |
| <i>Rose-bengal</i>        | contrast agent                                 |                                    | Launched    |
| <i>LGD-6972</i>           |                                                |                                    |             |
| <i>Narlaprevir</i>        | HCV inhibitor                                  |                                    | P2/P3       |
| <i>Obatoclax</i>          | BCL inhibitor                                  | BCL2                               | Phase 3     |
| <i>Domiphen</i>           |                                                |                                    | Preclinical |
| <i>PSB-06126</i>          | NTPDase inhibitor                              | ENTPD3                             | Preclinical |
| <i>NSC-95397</i>          | CDC inhibitor                                  | CDC25A, CDC25B                     | Preclinical |
| <i>Deltarasin</i>         | phosphodiesterase inhibitor                    | KRAS                               | Preclinical |
| <i>Calpeptin</i>          | calpain inhibitor                              |                                    | Preclinical |
| <i>TNP-470</i>            | methionine aminopeptidase inhibitor            |                                    | Phase 2     |
| <i>TC-LPA5-4</i>          | lysophosphatidic acid receptor antagonist      | LPAR5                              | Preclinical |
| <i>Hemin</i>              | enzyme inducer                                 |                                    | Launched    |
| <i>Sennoside</i>          |                                                |                                    | Preclinical |
| <i>PYR-41</i>             | ubiquitin activating enzyme inhibitor          |                                    | Preclinical |
| <i>Telaprevir</i>         | HCV inhibitor                                  | CTSA, PGR                          | Launched    |
| <i>Evans-blue</i>         | glutamate receptor modulator                   | GRIA1, PTPN1                       | Launched    |
| <i>C646</i>               | histone acetyltransferase inhibitor            | EP300                              | Preclinical |
| <i>NSC-663284</i>         | CDC inhibitor                                  | CDC25A, CDC25B, CDC25C             | Preclinical |
| <i>TCID</i>               |                                                |                                    | Preclinical |
| <i>Hematoporphyrin</i>    |                                                |                                    | Launched    |
| <i>16-BAC</i>             | cationic surfactant                            |                                    | Preclinical |
| <i>BMS-833923</i>         | smoothed receptor antagonist                   | SMO                                | Phase 2     |
| <i>AVN-492</i>            |                                                |                                    |             |
| <i>Ascorbyl palmitate</i> |                                                |                                    | Preclinical |
| <i>Elacestrant</i>        |                                                |                                    |             |
| <i>Eifuroxazide</i>       |                                                |                                    |             |
| <i>Aurothioglucose</i>    | PKC inhibitor                                  | PRKCI                              | Launched    |
| <i>Nifursol</i>           | bacterial DNA inhibitor                        |                                    | Launched    |
| <i>NS-1643</i>            | voltage-gated K <sup>+</sup> channel activator | KCNH2, KCNH6, KCNMA1               | Preclinical |
| <i>Tiplaxtinin</i>        | plasminogen activator inhibitor                | SERPINE1                           | Phase 1     |
| <i>Thiomersal</i>         | antibiotic                                     | OXCT1                              | Launched    |
| <i>Indocyanine-green</i>  | contrast agent                                 | SLCO1B1                            | Launched    |
| <i>Chlortetracycline</i>  | protein synthesis inhibitor                    |                                    | Launched    |
| <i>Carbazochrome</i>      |                                                |                                    | Launched    |
| <i>Altrenogest</i>        | progesterone hormone                           | PGR                                | Launched    |
| <i>Emricasan</i>          |                                                |                                    |             |
| <i>GSK2801</i>            | bromodomain inhibitor                          | BAZ2A, BAZ2B                       | Preclinical |
| <i>Anthralin</i>          | DNA synthesis inhibitor                        |                                    | Launched    |
| <i>Melphalan</i>          | DNA alkylating agent, DNA inhibitor            |                                    | Launched    |
| <i>RITA</i>               | MDM inhibitor                                  | MDM2                               | Preclinical |
| <i>Azeliragon</i>         | RAGE receptor antagonist                       | AGER                               | Phase 3     |

155

156

157

## 158 **Analysis of potency**

159 We validated the hits from the primary screen by conducting a 10-point dose-response analysis with a drug  
160 concentration range from 150  $\mu\text{M}$  down to 7.6 nM (3-fold dilution series). From this dose-response analysis,  
161  $\text{IC}_{50}$  values were calculated for dose-responsive hits. Several of the drugs uncovered in our screen  
162 including, Boceprevir ( $\text{IC}_{50} = 0.95 \mu\text{M}$ ), Ciluprevir ( $\text{IC}_{50} = 20.77 \mu\text{M}$ ), Narlaprevir ( $\text{IC}_{50} = 1.10 \mu\text{M}$ ),  
163 Telaprevir ( $\text{IC}_{50} = 15.25 \mu\text{M}$ ), are antiviral compounds targeting the hepatitis C NS3 protease.  
164 Boceprevir, Narlaprevir, and Telaprevir are approved drugs with a track record of safe use in human patients  
165 <sup>23-28</sup>. Other relatively potent dose responsive compounds emerging from our screen include calpeptin ( $\text{IC}_{50}$   
166  $= 4.05 \mu\text{M}$ ), aurothioglucose ( $\text{IC}_{50} = 13.32 \mu\text{M}$ ), PYR-41 ( $\text{IC}_{50} = 17.38 \mu\text{M}$ ), and hemin ( $\text{IC}_{50} = 9.68 \mu\text{M}$ )  
167 (Fig 3).

168

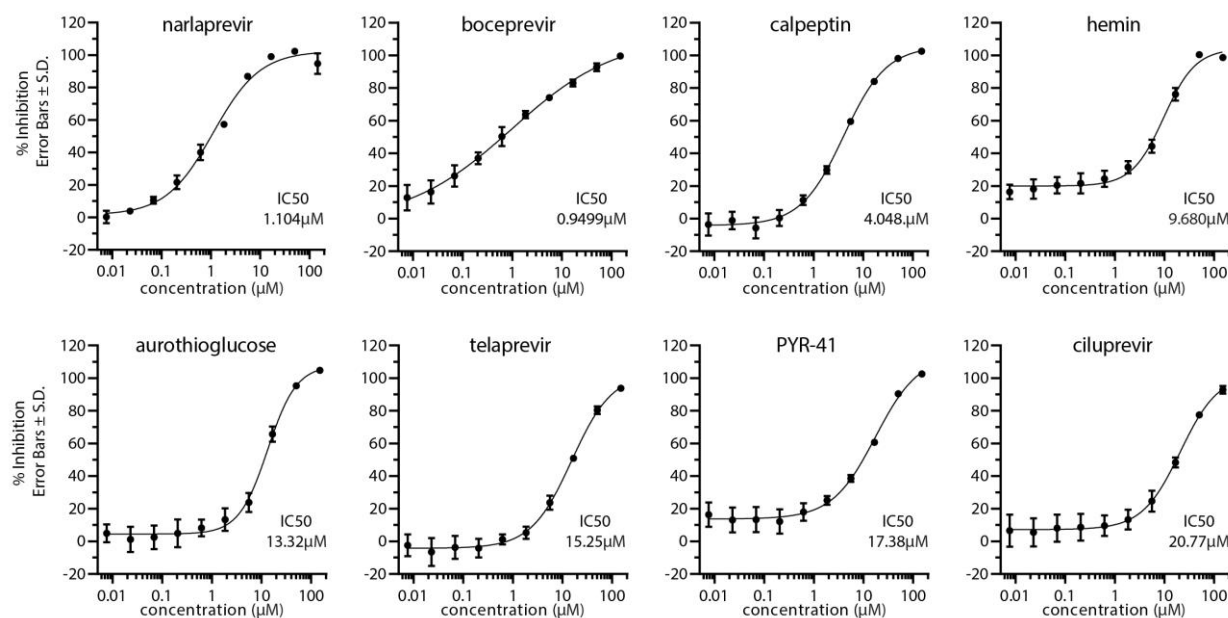

169

## 170 **Fig 3. Dose-response validation of compounds against SARS-CoV-2 Mpro**

171 Dose response curves were generated using Ac-Abu-Tle-Leu-Gln-AFC substrate. Percent inhibition of  
172 each compound was calculated at indicated 10 concentrations by comparing slope of treatment versus  
173 DMSO control. Error bars represent standard deviation and  $n=3$  for each concentration.  $\text{IC}_{50}$  values are  
174 indicated and calculated by 4-parameter nonlinear regression curve fitting.

175

## 176 **The relative utility of *in silico* and HTS repurposing screens**

177 The recent publication of the crystal structure for Mpro has enabled computational approaches to Mpro

178 drug discovery <sup>8,9</sup>. We leveraged the existing structural data (PDB entry 6LU7) to conduct a computational

179 free energy calculation based *in silico* screening approach. To do this we have utilized the Schrodinger  
180 Maestro software package <sup>29,30</sup> to conduct a computational docking of all compounds in the Broad  
181 Repurposing library. Using this approach, we derived a docking score for each compound (see Table S1  
182 for broad repurposing library with docking scores). We observe a poor correlation (Pearson  $r=0.02864$ )  
183 between Mpro docking score and Z-score in the protease inhibition assay (Fig 4A). Furthermore, top hits  
184 from the screen also exhibit a weak correlation (Pearson  $r=-0.1503$ ) between compound potency and  
185 docking score (Fig 4B).

186

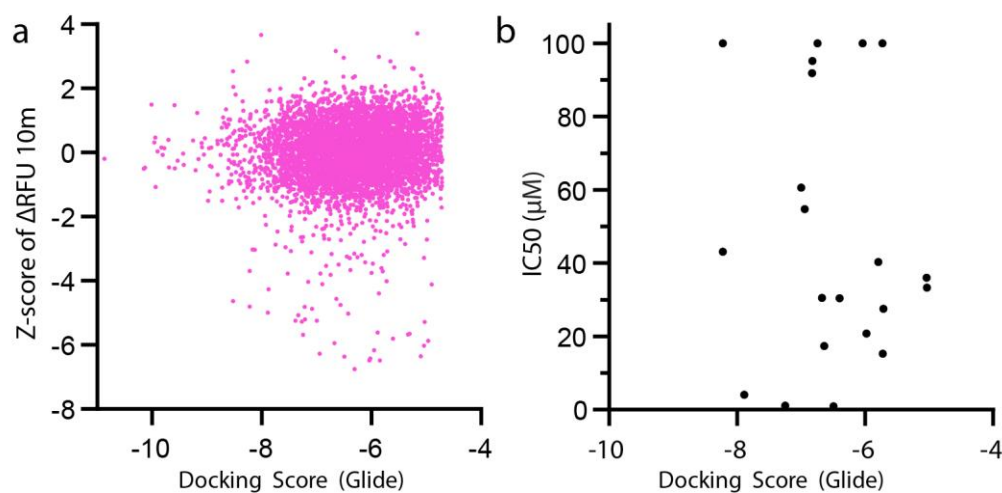

187 **Fig 4. Correlation of Experimental and In Silico identification**

188 (a) Correlation of Z-score for all Broad Repurposing library compounds and Docking Score. Pearson  $r =$   
189  $0.02864$  (95% CI  $0.003478-0.05376$ ), P value =  $0.0257$  and XY pairs =  $6068$ . Linear equation  $Y=0.03452x+$   
190  $0.2202$  as fitted by simple linear regression, slope significantly deviated from 0, P value =  $0.0016$ . (b)  
191 Correlation of IC<sub>50</sub> vs Docking Score. Pearson  $r = -0.1053$  (95% CI  $-0.5136-0.3420$ ), P value =  $0.6498$  and  
192 XY Pairs =  $21$ . Linear equation  $Y=-4.188x+20.41$  as fitted by simple linear regression, slope not  
193 significantly deviated from 0, P value =  $0.6498$ .

194

195

196 **Table S1. Broad Library SDF with Docking scores—see attached file**

197

198 **Discussion**

199 **Therapeutic potential of Mpro as a target**

200 A general discussion of drug repurposing for COVID-19 suggests viral encoded proteases may be relevant  
201 therapeutic targets for coronaviruses <sup>31</sup>. Relative to most other human viruses, our understanding of the  
202 virology of SARS-CoV-2 remains incomplete. However, after decades of extensive research, we have  
203 learned a great deal about viral proteases in general and the chemical means to inhibit them from our studies  
204 of HIV-1, hepatitis C and rhinoviruses. Likewise protease inhibitors targeting the SARS protease have  
205 been investigated <sup>32,33</sup>. Furthermore, previous work on SARS Mpro has demonstrated that it is a targetable  
206 enzyme worth significant translational effort <sup>34</sup>.

207

208 **Perspective on hit compounds and future screening**

209 Sequence alignment shows a high degree of homology between SARS Mpro and SARS-CoV-2 Mpro with  
210 ~95% amino acid sequence identity. Recent studies have solved the crystal structure of SARS-CoV-2 Mpro  
211 and compared it with SARS Mpro showing that they have similar but distinct active site pockets and will  
212 require distinct drugs for potent and highly specific inhibition. This sequence and structural information has  
213 provided an opportunity to conduct *in silico* docking of known drugs to the COVID-19 virus Mpro active  
214 site. However thus far, such analysis has not uncovered potent inhibitors of Mpro. Recent *in silico* work  
215 has suggested that protease inhibitor drugs may inhibit SARS-CoV-2 Mpro <sup>35,36</sup>. However, our findings  
216 suggest that *in silico* approaches alone cannot substitute for enzyme kinetic screening evaluation of Mpro

217 inhibitors because most identified high scoring compounds in *in silico* docking studies lack activity against  
218 Mpro in kinetic protease assays.

219

## 220 **Potential for Drug Repurposing and Clinical Trials**

221 To date clinical trials for COVID-19 have not yielded potent antiviral therapies. The objective of this work  
222 is to complete a survey of approved drugs to identify therapies that can block COVID-19 viral replication  
223 by inhibiting the main viral protease. The advantage of this approach is that any approved drug identified  
224 can be advanced rapidly to clinical trials without extensive multi-year preclinical development efforts. This  
225 is also particularly germane given the limitations of animal models of COVID-19 infection and  
226 pathogenesis.

227 A diverse variety of initial hits were identified in our high throughput screen of the broad library.  
228 Of these, the most potent hits are all known protease inhibitors and there is strong representation from  
229 protease inhibitors developed to inhibit HCV protease NS3/4A (Boceprevir, Ciluprevir, Narlaprevir, and  
230 Telaprevir). Clearly as approved or well-developed clinical candidates, these drugs exhibit  
231 pharmacological and pharmacodynamic properties well suited to repurposing as a COVID-19 antiviral  
232 therapy. Boceprevir and Narlaprevir appear the most potent against Mpro and may be suitable for  
233 repurposing.

234

235 Previous clinical evaluation of Boceprevir (also known as Victrelis) showed it to be safe and  
236 effective for treating HCV<sup>37</sup>. Boceprevir was approved as a first in class HCV NS3/4A serine protease  
237 inhibitor for treatment of chronic HCV infection. Boceprevir was FDA approved for use in the USA in  
238 2011 and Boceprevir treatment is given as a combination therapy with interferon  $\alpha$ 2b and ribavirin.  
239 Likewise, clinical evaluation of Narlaprevir (also known as Arlansa or SCH900518) showed it to be both

240 safe and to exhibit antiviral activity when combined with interferon  $\alpha 2b$  <sup>38</sup>. Furthermore, Narlaprevir has  
241 been show effective against HCV NS3/4A mutations causing resistance to protease inhibitors <sup>39</sup>.  
242 Narlaprevir was approved for use against HCV in Russia in 2016.

243  
244 Our findings demonstrate Boceprevir and Narlaprevir potency against SARS-CoV-2 Mpro in the  
245 one micromolar range. Previous work to develop Boceprevir and Narlaprevir as approved HCV  
246 therapeutics make them drug repurposing candidates worth further evaluation. Likewise, previous  
247 commercially developed NS3/4A inhibitor lead compounds may be suitable for further repurposing studies.  
248 The COVID-19 pandemic has revealed an urgent unmet medical need for potent antiviral agents for  
249 treatment of SARS-CoV-2 infection. Because antiviral therapies are frequently most effective when used  
250 in combination <sup>40</sup>, it may be useful to consider combining Mpro inhibition with other antiviral strategies for  
251 treating SARS-CoV-2 infection. For instance, inhibition of the SARS-CoV-2 replicase in combination with  
252 Mpro inhibition might exhibit synergistic antiviral activity. Remdesivir, a broad-spectrum antiviral  
253 replicase inhibitor has shown efficacy against a wide variety of RNA viral replicases including SARS-CoV-  
254 2 <sup>41,42</sup>. Thus, combination therapies using Boceprevir/Remdesivir or Narlaprevir/Remdesivir may yield a  
255 synergistic drug repurposing strategy for treating COVID-19. Taken together, the work presented here  
256 supports the rapid evaluation of previous HCV NS3/4A inhibitors for repurposing as a COVID-19 therapy.

257 **Methods:**

258

259 **Recombinant Protein**

260 Recombinant Mpro was purified using constructs and methods as previously described<sup>8</sup>. pGEX-6p-1  
261 plasmid containing SARS-CoV-2 Mpro was gifted from Hilgenfeld lab at Luebeck University, Germany.  
262 Plasmid was transformed into BL21 (DE3) bacteria (NEB). A single colony was inoculated into 10mL  
263 Terrific Broth (TB) + Carbenicillin (25ug/mL) and grown overnight to saturation. Overnight culture was  
264 transferred into 1L of TB and grown in a shaking incubator at 37°C until log phase (OD<sub>600</sub>~0.7). Culture  
265 was induced with IPTG (1mM final) and kept in 37°C shaking incubator for 4 hours. Culture was spun  
266 down at 3,400rpm for 30 min at 4°C, and pellet resuspended in PBS with 10% sucrose then spun at previous  
267 conditions. PBS was aspirated and bacteria pellet was snap frozen in liquid nitrogen and stored at -70°C.  
268 Pellet was thawed and resuspended in Lysis buffer (PBS, 0.3% lysozyme, 1mM DTT, 1.5% Sarkosyl,  
269 RNase A, and DNase I) and sonicated for 10 seconds ON time, 20 seconds OFF time for 5 minutes of  
270 total ON time at 60% amplitude. Lysate was spun at 16,000rpm for 30 minutes at 4°C. 4mL of Ni-NTA  
271 beads and supernatant were rotated for 2 hours at room temperature. Gravity column was used for  
272 purification with His<sub>6</sub>-tagged Mpro binding to Ni-NTA beads (Qiagen 30210), washed with lysis buffer +  
273 10mM imidazole and eluted with increasing concentration of imidazole (50mM, 100mM, 150mM and  
274 200mM). The majority of Mpro eluted at between 150-200mM imidazole and was 90%+ pure by  
275 Coomassie stained gel analysis. Mpro fractions were pooled and buffer exchanged into 20mM Tris pH 7.8,  
276 150mM NaCl, 1mM EDTA, 1mM DTT, and snap frozen in liquid nitrogen and stored at -70°C. Yield and  
277 purity were assessed via BCA (ThermoFisher 23225) and Coomassie-stained SDS-PAGE.

278

279

## 280 **Fluorescent Mpro Protease Assay**

281 Fluorescent Mpro peptides were synthesized by Anaspec ([www.anaspec.com](http://www.anaspec.com)) at 90% purity and frozen in  
282 1 mg aliquots. Stock concentration of substrates were made by reconstituting powder in 100uL DMSO  
283 (10mg/ml) and storing at -70°C. Optimal Mpro substrates were previously determined to be Ac-Val-Lys-  
284 Leu-Gln-AFC for physiological substrates and Ac-Abu-Tle-Leu-Gln-AFC, a noncanonical amino acid  
285 substrate <sup>20</sup>. Ac-Val-Lys-Leu-Gln-AFC and Ac-Abu-Tle-Leu-Gln-AFC fluorogenic substrates were  
286 monitored at 380/20 nm excitation and 500/20 nm emission wavelengths. FRET-based substrates Dabcyl-  
287 Val-Lys-Leu-Gln-EDANS was measured at 336/20 nm excitation and 490/20 nm emission wavelengths  
288 and MCA-Ala-Val-Lys-Gln-Ser-Gly-Phe-Lys-DNP-Lys was monitored at 325/20 nm excitation and  
289 392/20 nm emission wavelengths. We used 20mM Tris pH 7.8, 150mM NaCl, 1mM EDTA, 1mM DTT,  
290 0.05% Triton X-100 as the assay buffer. Assay conditions were at room temperature (25°C) for all assays.

291

## 292 **2D Titration main screen optimization**

293 2D titration for determining the main screen ratios was done in 96 well black opaque plates (Corning 3686  
294 NBS). The top concentration of Mpro was 2.5µM and serial diluted to 0.0395µM along the Y-axis of the  
295 plate. The top concentration of substrate was 16µM and serial diluted along the X-axis of the plate.  
296 Fluorescence was monitored at 380/20 nm excitation and 500/20 nm emission wavelengths.

297

## 298 **Broad Repurposing Library**

299 The Broad Repurposing Library was ordered and plated into black opaque 384-well plates (Greiner 781209)  
300 at 100nL of 10mM (slight variations depending on compound) compound in DMSO. 10uL of diluted Mpro  
301 (625nM final concentration in reaction buffer detailed above) was added with a MultiFlo FX liquid  
302 dispenser using a 5µL cassette. Compounds were incubated with Mpro for 10 minutes at RT after which



303 10uL of substrate (8uM final concentration of either Ac-VKLQ-AFC or Ac-Abu-Tle-Leu-Gln-AFC) was  
304 dispensed into the plate and read using a Cytation 5 multi-mode reader immediately at 380/20 nm excitation  
305 and 500/20 nm emission wavelengths every 5 minutes for 30 minutes. Data was analyzed using Biotek  
306 Gen5 software, Microsoft Excel, and GraphPad Prism 8.

307

### 308 **Dose validation assays**

309 Hit compounds were ordered from the Broad Institute pre-plated in 384-well format (Greiner 781209) as  
310 10-point serial dilutions (3-fold) at 300nL per well. Mpro (80nM final concentration) and substrate (Ac-  
311 Abu-Tle-Leu-Gln-AFC at 32μM final concentration) were dispensed in the same manner described above.

312 Inhibition was calculated as  $1 - \frac{\Delta RFU(10m)_{sample}}{\Delta RFU(10m)_{control}}$  at each concentration and data fitted to 4-parameter  
313 nonlinear regression model using GraphPad Prism 8.

314

### 315 ***In Silico* Docking of the Broad Repurposing Library with Mpro**

316 We utilized the Schrodinger Maestro software package <sup>29,30</sup> to conduct a computational docking of all  
317 compounds in the Broad Repurposing library. In this approach we generated a receptor grid model of the  
318 Mpro active site and serially docked each compound in the Broad Repurposing library with the active site  
319 model using the physics based Glide algorithm <sup>43,44</sup>. We chose the Glide algorithm over the many competing  
320 options because of its superior performance in head to head comparisons of algorithms <sup>43</sup>.

321

### 322 **Statistical analyses, IC50 Calculation, Selectivity Calculation, and figures.**

323 Graphs were generated using GraphPad Prism 8. IC50 calculations were performed using GraphPad Prism  
324 8 curve fitting using 4-parameter non-linear regression.

325 **Author Contributions**

326 J.D.B. and B.C.K. designed research; J.D.B., R.L.U. performed research; J.C.K performed *in silico* docking.

327 J.D.B. and B.C.K. analyzed data; B.C.K. & J.D.B. wrote the first draft of the manuscript. All authors

328 reviewed, edited, and approved the final version of the manuscript.

329

330 **Funding Sources**

331 This work was funded by the Department of Veterans Affairs and a Postdoctoral Fellowship from the

332 Washington Research Foundation (WRF to J.D.B.)

333

334 **Acknowledgements:**

335 We thank Timothy Strovas, Aleen Saxton, Caleb A. Baker, Misa Baum, and Jeanna Wheeler for sharing

336 their expertise.

337

338 References

- 339 1 Phelan, A. L., Katz, R. & Gostin, L. O. The Novel Coronavirus Originating in Wuhan,  
340 China: Challenges for Global Health Governance. *JAMA*, doi:10.1001/jama.2020.1097  
341 (2020).
- 342 2 Chang *et al.* Epidemiologic and Clinical Characteristics of Novel Coronavirus Infections  
343 Involving 13 Patients Outside Wuhan, China. *JAMA*, doi:10.1001/jama.2020.1623 (2020).
- 344 3 Rabi, F. A., Al Zoubi, M. S., Kasasbeh, G. A., Salameh, D. M. & Al-Nasser, A. D. SARS-  
345 CoV-2 and Coronavirus Disease 2019: What We Know So Far. *Pathogens* **9**,  
346 doi:10.3390/pathogens9030231 (2020).
- 347 4 Zhao, H. L., Huang, Y. M. & Huang, Y. Mortality in Older Patients with COVID-19. *J Am*  
348 *Geriatr Soc*, doi:10.1111/jgs.16649 (2020).
- 349 5 Zhao, W., Zhong, Z., Xie, X., Yu, Q. & Liu, J. Relation Between Chest CT Findings and  
350 Clinical Conditions of Coronavirus Disease (COVID-19) Pneumonia: A Multicenter  
351 Study. *AJR Am J Roentgenol*, 1-6, doi:10.2214/AJR.20.22976 (2020).
- 352 6 de Wit, E., van Doremalen, N., Falzarano, D. & Munster, V. J. SARS and MERS: recent  
353 insights into emerging coronaviruses. *Nat Rev Microbiol* **14**, 523-534,  
354 doi:10.1038/nrmicro.2016.81 (2016).
- 355 7 Shi, S. T. & Lai, M. M. Viral and cellular proteins involved in coronavirus replication.  
356 *Curr Top Microbiol Immunol* **287**, 95-131, doi:10.1007/3-540-26765-4\_4 (2005).
- 357 8 Zhang, L. *et al.* Crystal structure of SARS-CoV-2 main protease provides a basis for design  
358 of improved alpha-ketoamide inhibitors. *Science*, doi:10.1126/science.abb3405 (2020).
- 359 9 Jin, Z. *et al.* Structure of M(pro) from COVID-19 virus and discovery of its inhibitors.  
360 *Nature*, doi:10.1038/s41586-020-2223-y (2020).
- 361 10 Piliero, P. J. Atazanavir: a novel HIV-1 protease inhibitor. *Expert opinion on*  
362 *investigational drugs* **11**, 1295-1301, doi:10.1517/13543784.11.9.1295 (2002).
- 363 11 You, D. M. & Pockros, P. J. Simeprevir for the treatment of chronic hepatitis C. *Expert*  
364 *opinion on pharmacotherapy* **14**, 2581-2589, doi:10.1517/14656566.2013.850074 (2013).
- 365 12 Ashburn, T. T. & Thor, K. B. Drug repositioning: identifying and developing new uses for  
366 existing drugs. *Nat Rev Drug Discov* **3**, 673-683, doi:10.1038/nrd1468 (2004).
- 367 13 Tobinick, E. L. The value of drug repositioning in the current pharmaceutical market. *Drug*  
368 *News Perspect* **22**, 119-125, doi:10.1358/dnp.2009.22.2.1303818 (2009).
- 369 14 Kwok, T. C. *et al.* A small-molecule screen in *C. elegans* yields a new calcium channel  
370 antagonist. *Nature* **441**, 91-95 (2006).

- 371 15 Petrascheck, M., Ye, X. & Buck, L. B. An antidepressant that extends lifespan in adult  
372 *Caenorhabditis elegans*. *Nature* **450**, 553-556 (2007).
- 373 16 Wermuth, C. G. Selective optimization of side activities: the SOSA approach. *Drug Discov*  
374 *Today* **11**, 160-164, doi:S1359-6446(05)03686-X [pii] 10.1016/S1359-6446(05)03686-X  
375 (2006).
- 376 17 Wermuth, C. G. Selective optimization of side activities: another way for drug discovery.  
377 *J Med Chem* **47**, 1303-1314, doi:10.1021/jm030480f (2004).
- 378 18 Corsello, S. M. *et al.* The Drug Repurposing Hub: a next-generation drug library and  
379 information resource. *Nat Med* **23**, 405-408, doi:10.1038/nm.4306 (2017).
- 380 19 D. Wishart, C. K., V. Law. *Drug Bank: Open Data Drug & Drug Target Database*,  
381 <<http://www.drugbank.ca/stats>> (2012).
- 382 20 <<https://doi.org/10.1101/2020.03.07.981928>> (2020).
- 383 21 Chuck, C. P. *et al.* Profiling of substrate specificity of SARS-CoV 3CL. *PLoS One* **5**,  
384 e13197, doi:10.1371/journal.pone.0013197 (2010).
- 385 22 Dai, W. *et al.* Structure-based design of antiviral drug candidates targeting the SARS-CoV-  
386 2 main protease. *Science* **368**, 1331-1335, doi:10.1126/science.abb4489 (2020).
- 387 23 Njoroge, F. G., Chen, K. X., Shih, N. Y. & Piwinski, J. J. Challenges in modern drug  
388 discovery: a case study of boceprevir, an HCV protease inhibitor for the treatment of  
389 hepatitis C virus infection. *Acc Chem Res* **41**, 50-59, doi:10.1021/ar700109k (2008).
- 390 24 Rotella, D. P. The discovery and development of boceprevir. *Expert opinion on drug*  
391 *discovery* **8**, 1439-1447, doi:10.1517/17460441.2013.843525 (2013).
- 392 25 Arasappan, A. *et al.* Discovery of Narlaprevir (SCH 900518): A Potent, Second Generation  
393 HCV NS3 Serine Protease Inhibitor. *ACS medicinal chemistry letters* **1**, 64-69,  
394 doi:10.1021/ml9000276 (2010).
- 395 26 Hotho, D. M. *et al.* Sustained virologic response after therapy with the HCV protease  
396 inhibitor narlaprevir in combination with peginterferon and ribavirin is durable through  
397 long-term follow-up. *J Viral Hepat* **20**, e78-81, doi:10.1111/jvh.12012 (2013).
- 398 27 Reesink, H. W. *et al.* Rapid decline of viral RNA in hepatitis C patients treated with VX-  
399 950: a phase Ib, placebo-controlled, randomized study. *Gastroenterology* **131**, 997-1002,  
400 doi:10.1053/j.gastro.2006.07.013 (2006).
- 401 28 Lang, L. Combination therapy with telaprevir and pegylated interferon suppresses both  
402 wild-type and resistant hepatitis C virus. *Gastroenterology* **132**, 5-6,  
403 doi:10.1053/j.gastro.2006.12.011 (2007).

- 404 29 Wang, L. *et al.* Accurate and reliable prediction of relative ligand binding potency in  
405 prospective drug discovery by way of a modern free-energy calculation protocol and force  
406 field. *J Am Chem Soc* **137**, 2695-2703, doi:10.1021/ja512751q (2015).
- 407 30 Kuhn, B. *et al.* Prospective Evaluation of Free Energy Calculations for the Prioritization of  
408 Cathepsin L Inhibitors. *J Med Chem* **60**, 2485-2497, doi:10.1021/acs.jmedchem.6b01881  
409 (2017).
- 410 31 Li, G. & De Clercq, E. Therapeutic options for the 2019 novel coronavirus (2019-nCoV).  
411 *Nat Rev Drug Discov* **19**, 149-150, doi:10.1038/d41573-020-00016-0 (2020).
- 412 32 Wang, H., Xue, S., Yang, H. & Chen, C. Recent progress in the discovery of inhibitors  
413 targeting coronavirus proteases. *Virologica Sinica* **31**, 24-30, doi:10.1007/s12250-015-  
414 3711-3 (2016).
- 415 33 Zhao, Q., Weber, E. & Yang, H. Recent developments on coronavirus main protease/3C  
416 like protease inhibitors. *Recent patents on anti-infective drug discovery* **8**, 150-156,  
417 doi:10.2174/1574891x113089990017 (2013).
- 418 34 Chu, C. M. *et al.* Role of lopinavir/ritonavir in the treatment of SARS: initial virological  
419 and clinical findings. *Thorax* **59**, 252-256, doi:10.1136/thorax.2003.012658 (2004).
- 420 35 Chen, Y. W., Yiu, C. B. & Wong, K. Y. Prediction of the SARS-CoV-2 (2019-nCoV) 3C-  
421 like protease (3CL (pro)) structure: virtual screening reveals velpatasvir, ledipasvir, and  
422 other drug repurposing candidates. *F1000Research* **9**, 129,  
423 doi:10.12688/f1000research.22457.2 (2020).
- 424 36 Shamsi, A. *et al.* Glecaprevir and Maraviroc are high-affinity inhibitors of SARS-CoV-2  
425 main protease: possible implication in COVID-19 therapy. *Bioscience reports* **40**,  
426 doi:10.1042/BSR20201256 (2020).
- 427 37 Poordad, F. *et al.* Boceprevir for untreated chronic HCV genotype 1 infection. *N Engl J*  
428 *Med* **364**, 1195-1206, doi:10.1056/NEJMoa1010494 (2011).
- 429 38 de Bruijne, J. *et al.* Antiviral activity of narlaprevir combined with ritonavir and pegylated  
430 interferon in chronic hepatitis C patients. *Hepatology* **52**, 1590-1599,  
431 doi:10.1002/hep.23899 (2010).
- 432 39 Tong, X. *et al.* Preclinical characterization of the antiviral activity of SCH 900518  
433 (narlaprevir), a novel mechanism-based inhibitor of hepatitis C virus NS3 protease.  
434 *Antimicrob Agents Chemother* **54**, 2365-2370, doi:10.1128/AAC.00135-10 (2010).
- 435 40 Tan, S. L., He, Y., Huang, Y. & Gale, M., Jr. Strategies for hepatitis C therapeutic  
436 intervention: now and next. *Curr Opin Pharmacol* **4**, 465-470,  
437 doi:10.1016/j.coph.2004.07.003 (2004).

- 438 41 Brown, A. J. *et al.* Broad spectrum antiviral remdesivir inhibits human endemic and  
439 zoonotic deltacoronaviruses with a highly divergent RNA dependent RNA polymerase.  
440 *Antiviral Res* **169**, 104541, doi:10.1016/j.antiviral.2019.104541 (2019).
- 441 42 Wang, M. *et al.* Remdesivir and chloroquine effectively inhibit the recently emerged novel  
442 coronavirus (2019-nCoV) in vitro. *Cell Res* **30**, 269-271, doi:10.1038/s41422-020-0282-0  
443 (2020).
- 444 43 Friesner, R. A. *et al.* Glide: a new approach for rapid, accurate docking and scoring. 1.  
445 Method and assessment of docking accuracy. *J Med Chem* **47**, 1739-1749,  
446 doi:10.1021/jm0306430 (2004).
- 447 44 Halgren, T. A. *et al.* Glide: a new approach for rapid, accurate docking and scoring. 2.  
448 Enrichment factors in database screening. *J Med Chem* **47**, 1750-1759,  
449 doi:10.1021/jm030644s (2004).
- 450
- 451
